# Supplementary material
Source: publisher figshare collection journal article supplement (https://acs.figshare.com/ndownloader/files/4349017)

SYSTEMATIC EVALUATION OF SOLID-  
PHASE MICROEXTRACTION COATINGS  
FOR UNTARGETED METABOLOMIC  
PROFILING OF BIOLOGICAL FLUIDS BY  
LIQUID CHROMATOGRAPHY-MASS  
SPECTROMETRY

*SUPPLEMENTARY INFORMATION*

*Dajana Vuckovic, Janusz Pawliszyn\**

Department of Chemistry, University of Waterloo, 200 University Avenue West,  
Waterloo, Canada, N2L 3G1

\* Corresponding author. Tel.: +1-519-8884641; Fax: +1-519-7460435

E-mail address: janusz@uwaterloo.ca (J. Pawliszyn)

## **SUMMARY**

This supporting information file includes additional results and information as described in the text of the main article including (1) list of SPE sorbents and their properties used in the coating evaluation, (2) summary of physicochemical properties of metabolites included in standard metabolite mixture, (3) summary of optimized LC-MS conditions used on Varian 500 ion trap instrument during the coating evaluation experiments, (4) detailed description of procedures and calculations for the determination of correction factors to use for coating comparison, (6) results for the dependence of the amount extracted on extraction time for the set of known metabolites after extraction of human plasma, (7) results for the carryover determination for the set of known metabolites after extraction of human plasma, (8) overview of proposed workflow for metabolomics using SPME, (9) results for the determination of absolute matrix effects (ionization suppression) using both reverse phase and HILIC methods for the analysis of human plasma using mixed-mode SPME fibre and (10) metabolite coverage obtained using plasma protein precipitation with acetonitrile (PP), plasma protein precipitation with methanol/ethanol (PM) and ultrafiltration (UF) in combination with negative reverse phase LC-MS method with pentafluorophenyl column.

**Supplementary Table 1. Summary of SPE sorbents and their properties.**

| Sorbent          | Manufacturer | Support | Type                                             | Functional group                                               | Particle size (μm) | Surface area (m <sup>2</sup> /g) | Pore size (Å) |
|------------------|--------------|---------|--------------------------------------------------|----------------------------------------------------------------|--------------------|----------------------------------|---------------|
| Clean Screen DAU | UCT          | silica  | reverse phase+SCX                                | proprietary and benzenesulfonic acid                           | 40-63              | NA                               | NA            |
| Clean Screen GHB | UCT          | silica  | proprietary mixed-mode                           |                                                                | NA                 | NA                               | NA            |
| SSBCX            | UCT          | silica  | SCX                                              | benzenesulfonic acid                                           | 40-63              | NA                               | NA            |
| C18+B            | UCT          | silica  | reverse phase+SCX                                | C <sub>18</sub> and benzenesulfonic acid                       | 40-63              | NA                               | NA            |
| C8+B             | UCT          | silica  | reverse phase+SCX                                | C <sub>8</sub> and benzenesulfonic acid                        | 40-63              | NA                               | NA            |
| RPA              | Supelco      | silica  | reverse phase                                    | C <sub>16</sub> with embedded amide                            | 3                  | 450                              | 100           |
| HiSEP            | Supelco      | silica  | reverse phase                                    | Surface modified with hydrophilic polymer                      | 5                  | NA                               | 120           |
| PEG              | Supelco      | silica  | reverse phase                                    | polyethylene glycol                                            | 5                  | NA                               | 120           |
| Discovery MCAX   | Supelco      | silica  | reverse phase+SCX                                | C <sub>8</sub> and benzenesulfonic acid                        | 50                 | 480                              | 70            |
| DPA 6S           | Supelco      | polymer | adsorption of compounds containing -OH and -COOH | polyamide resin                                                | 50-120             | NA                               | NA            |
| Oasis MCX        | Waters       | polymer | reverse phase + SCX                              | N-vinylpyrrolidone divinyl benzene copolymer + sulfonic acid   | 30                 | 810                              | 80            |
| Oasis WAX        | Waters       | polymer | reverse phase + WAX                              | N-vinylpyrrolidone divinyl benzene copolymer + piperazine      | 30                 | 810                              | 80            |
| Oasis WCX        | Waters       | polymer | reverse phase + WCX                              | N-vinylpyrrolidone divinyl benzene copolymer + carboxylic acid | 30                 | 810                              | 80            |

| Sorbent        | Manufacturer        | Support | Type                   | Functional group                                                             | Particle size (μm) | Surface area (m <sup>2</sup> /g) | Pore size (Å) |
|----------------|---------------------|---------|------------------------|------------------------------------------------------------------------------|--------------------|----------------------------------|---------------|
| Oasis MAX      | Waters              | polymer | reverse phase + SAX    | N-vinylpyrrolidone divinyl benzene copolymer + quaternary amine              | 30                 | 810                              | 80            |
| HRP            | Macherey Nagel      | polymer | reverse phase          | highly porous styrene divinylbenzene polymer                                 | 50-100             | 1200                             | NA            |
| HRX            | Macherey Nagel      | polymer | reverse phase          | hydrophobic styrene divinylbenzene polymer                                   | 85                 | 1000                             | 55-60         |
| Carboxen-1016  | Supelco             | carbon  | adsorption             | graphitized carbon, 60/80 mesh                                               | 177-250            | NA                               | NA            |
| Diamino        | Macherey Nagel      | silica  | special                | primary and secondary amine                                                  | 45                 | 500                              | 60            |
| Easy           | Macherey Nagel      | polymer | reverse phase + WAX    | polar-modified styrene divinylbenzene polymer + unknown WAX group            | 80                 | 650-700                          | 50            |
| AccuCAT        | Varian              | silica  | SAX + SCX              | sulfonic acid and quaternary amine                                           | 40                 | NA                               | 60            |
| Spe-ed Advanta | Applied Separations | polymer | reverse phase + WCX    | polar-modified styrene divinylbenzene polymer (carboxylic acid modification) | NA                 | NA                               | NA            |
| Certify        | Varian              | silica  | reverse phase + SCX    | C <sub>8</sub> and benzenesulfonic acid                                      | 40                 | NA                               | 60            |
| Certify II     | Varian              | silica  | reverse phase + SAX    | C <sub>8</sub> and quaternary amine                                          | 40                 | NA                               | 60            |
| CH             | Applied Separations | silica  | reverse phase          | cyclohexyl                                                                   | 40                 | NA                               | 60            |
| Focus          | Varian              | polymer | normal + reverse phase | polar-modified styrene divinylbenzene polymer                                | NA                 | NA                               | NA            |
| Screen A       | Phenomenex          | silica  | reverse phase + SAX    | C <sub>8</sub>                                                               | 55                 | 500                              | 70            |

| Sorbent    | Manufacturer        | Support | Type                | Functional group                                                       | Particle size (μm) | Surface area (m <sup>2</sup> /g) | Pore size (Å) |
|------------|---------------------|---------|---------------------|------------------------------------------------------------------------|--------------------|----------------------------------|---------------|
| Screen C   | Phenomenex          | silica  | reverse phase + SCX | C <sub>8</sub> and benzenesulfonic acid                                | 55                 | 500                              | 70            |
| Strata X   | Phenomenex          | polymer | reverse phase       | surface modified styrene divinylbenzene polymer with pyrrolidone group | 33                 | 800                              | 85            |
| Strata XAW | Phenomenex          | polymer | reverse phase + WAX | surface modified styrene divinylbenzene polymer + diamine group        | 33                 | 800                              | 85            |
| Strata XCW | Phenomenex          | polymer | reverse phase + WCX | surface modified styrene divinylbenzene polymer + carboxylic acid      | 33                 | 800                              | 85            |
| PBA        | Varian              | silica  | covalent            | phenylboronic acid                                                     | 40                 | NA                               | 60            |
| PH         | Applied Separations | silica  | reverse phase       | phenyl                                                                 | 40                 | NA                               | 60            |
| Plexa      | Varian              | polymer | reverse phase       | proprietary highly polar hydroxylated polymer                          | NA                 | NA                               | NA            |
| Plexa PCX  | Varian              | polymer | reverse phase + SCX |                                                                        | NA                 | NA                               | NA            |

**Supplementary Table 2 Physicochemical properties of metabolites included in standard metabolite mixture.**

| Analyte                            | Formula                                                                       | Molecular Weight (MW) | pKa <sup>1</sup> | Log P <sup>1</sup> |
|------------------------------------|-------------------------------------------------------------------------------|-----------------------|------------------|--------------------|
| 3-hydroxybutyric acid (HBA)        | C <sub>4</sub> H <sub>8</sub> O <sub>3</sub>                                  | 104.1                 | 4.41             | -0.47              |
| Adenine                            | C <sub>5</sub> H <sub>5</sub> N <sub>5</sub>                                  | 135.1                 | 4.15             | -0.09              |
| Adenosine                          | C <sub>10</sub> H <sub>13</sub> N <sub>5</sub> O <sub>4</sub>                 | 267.2                 | NA               | -1.05              |
| Adenosine diphosphate (ADP)        | C <sub>10</sub> H <sub>15</sub> N <sub>5</sub> O <sub>10</sub> P <sub>2</sub> | 427.2                 | NA               | -2.64              |
| Adenosine monophosphate (AMP)      | C <sub>10</sub> H <sub>14</sub> N <sub>5</sub> O <sub>7</sub> P               | 347.2                 | NA               | -1.68              |
| Adenosine triphosphate (ATP)       | C <sub>10</sub> H <sub>16</sub> N <sub>5</sub> O <sub>13</sub> P <sub>3</sub> | 507.2                 | NA               | -3.61              |
| β-Estradiol                        | C <sub>18</sub> H <sub>24</sub> O <sub>2</sub>                                | 272.4                 | NA               | 4.01               |
| β-NAD                              | C <sub>21</sub> H <sub>27</sub> N <sub>7</sub> O <sub>14</sub> P <sub>2</sub> | 663.4                 | NA               | -3.68              |
| Cholic acid                        | C <sub>24</sub> H <sub>40</sub> O <sub>5</sub>                                | 408.6                 | 4.98             | 2.02               |
| Choline                            | C <sub>5</sub> H <sub>14</sub> NO <sup>+</sup>                                | 104.1                 | NA               | -5.16              |
| Citric acid                        | C <sub>6</sub> H <sub>8</sub> O <sub>7</sub>                                  | 192.1                 | 2.79             | -1.64              |
| Fructose                           | C <sub>6</sub> H <sub>12</sub> O <sub>6</sub>                                 | 180.2                 | 12.1             | -1.55              |
| Fumaric acid                       | C <sub>4</sub> H <sub>4</sub> O <sub>4</sub>                                  | 116.1                 | 3.03             | 0.46               |
| Glucose                            | C <sub>6</sub> H <sub>12</sub> O <sub>6</sub>                                 | 180.2                 | 12.9             | -3.24              |
| Glucose 6-phosphate                | C <sub>6</sub> H <sub>13</sub> O <sub>9</sub> P                               | 260.1                 | 1.11             | -3.79              |
| Glutamic acid                      | C <sub>5</sub> H <sub>9</sub> NO <sub>4</sub>                                 | 147.1                 | 2.23             | -3.69              |
| Glutathione (oxidized)             | C <sub>20</sub> H <sub>32</sub> N <sub>6</sub> O <sub>12</sub> S <sub>2</sub> | 612.6                 | NA               | -7.89              |
| Glutathione (reduced)              | C <sub>10</sub> H <sub>17</sub> N <sub>3</sub> O <sub>6</sub> S               | 307.3                 | NA               | -5.41              |
| Histamine                          | C <sub>5</sub> H <sub>9</sub> N <sub>3</sub>                                  | 111.1                 | 9.8              | -0.7               |
| Histidine                          | C <sub>6</sub> H <sub>9</sub> N <sub>3</sub> O <sub>2</sub>                   | 155.2                 | 2.76             | -3.32              |
| Hydrocortisone (cortisol)          | C <sub>21</sub> H <sub>30</sub> O <sub>5</sub>                                | 362.5                 | NA               | 1.61               |
| Linoleic acid                      | C <sub>18</sub> H <sub>32</sub> O <sub>2</sub>                                | 280.4                 | 4.77             | 7.05               |
| Lysine                             | C <sub>6</sub> H <sub>14</sub> N <sub>2</sub> O <sub>2</sub>                  | 146.2                 | 3.12             | -3.05              |
| Maleic acid                        | C <sub>4</sub> H <sub>4</sub> O <sub>4</sub>                                  | 116.1                 | 1.83             | -0.48              |
| Nicotinamide                       | C <sub>6</sub> H <sub>6</sub> N <sub>2</sub> O                                | 122.1                 | 3.35             | -0.37              |
| Phenylalanine                      | C <sub>9</sub> H <sub>11</sub> NO <sub>2</sub>                                | 165.2                 | 1.24             | -1.38              |
| Progesterone                       | C <sub>21</sub> H <sub>30</sub> O <sub>2</sub>                                | 314.5                 | NA               | 3.87               |
| Protoporphyrin IX                  | C <sub>34</sub> H <sub>34</sub> N <sub>4</sub> O <sub>4</sub>                 | 562.7                 | NA               | 7.43               |
| Pyruvic acid                       | C <sub>3</sub> H <sub>4</sub> O <sub>3</sub>                                  | 88.1                  | 2.45             | -1.24              |
| Riboflavin                         | C <sub>17</sub> H <sub>20</sub> N <sub>4</sub> O <sub>6</sub>                 | 376.4                 | 10.2             | -1.46              |
| Ribose-5-phosphate                 | C <sub>5</sub> H <sub>11</sub> O <sub>8</sub> P                               | 230.1                 | NA               | -2.65              |
| Sucrose                            | C <sub>12</sub> H <sub>22</sub> O <sub>11</sub>                               | 342.3                 | 12.6             | -3.7               |
| Taurocholic acid                   | C <sub>26</sub> H <sub>45</sub> NO <sub>7</sub> S                             | 515.7                 | NA               | 0.01               |
| Thyroxine                          | C <sub>15</sub> H <sub>11</sub> I <sub>4</sub> NO <sub>4</sub>                | 776.8                 | NA               | 4.12               |
| Tryptophan                         | C <sub>11</sub> H <sub>12</sub> N <sub>2</sub> O <sub>2</sub>                 | 204.2                 | 7.38             | -1.06              |
| Uridine diphosphate glucose (UDPG) | C <sub>15</sub> H <sub>24</sub> N <sub>2</sub> O <sub>17</sub> P <sub>2</sub> | 566.3                 | NA               | -5.8               |

<sup>1</sup> Syracuse Research Corporation, *PhysProp Database*, accessed May 2009.

**Supplementary Table 3. Summary of optimized LC-MS parameters on Varian 500 iontrap LC-MS instrument**

| <b>LC parameter</b>        | <b>Reverse phase LC method</b>                                                                              | <b>HILIC LC method</b>                                                                                       |
|----------------------------|-------------------------------------------------------------------------------------------------------------|--------------------------------------------------------------------------------------------------------------|
| <b>Analytical column</b>   | HS F5 Pentafluorophenyl (Supelco)                                                                           | Ascentis Si (Supelco)                                                                                        |
| <b>Column dimensions</b>   | 2.1 x 10 mm                                                                                                 | 2.1 x 10 mm                                                                                                  |
| <b>Particle size</b>       | 3 µm                                                                                                        | 3 µm                                                                                                         |
| <b>Mobile phase A</b>      | Water/acetic acid (99.9/0.1, v/v)                                                                           | ammonium formate/acetonitrile (5/95, 2 mM total)                                                             |
| <b>Mobile phase B</b>      | water/acetonitrile/acetic acid (89.9/10/0.1)                                                                | ammonium formate/acetonitrile (40/60, 2 mM total)                                                            |
| <b>Flow rate</b>           | 200 µL/min                                                                                                  | 200 µL/min                                                                                                   |
| <b>Injection volume</b>    | 20 µL                                                                                                       | 20 µL                                                                                                        |
| <b>Run time</b>            | 35 min                                                                                                      | 30 min                                                                                                       |
| <b>Gradient program</b>    | 0-3 min 100% A, 3-20 min linear gradient to 10%A, 20-30 min hold at 10% A, 5 min re-equilibration at 100% A | 0-2 min 100% A, 2-14 min linear gradient to 65%A, 14-18 min hold at 65% A, 12 min re-equilibration at 100% A |
| <b>Nebulizer pressure</b>  | 60 psi                                                                                                      | 60 psi                                                                                                       |
| <b>Drying gas pressure</b> | 22 psi                                                                                                      | 22 psi                                                                                                       |
| <b>Temperature</b>         | 400 °C                                                                                                      | 400 °C                                                                                                       |

### **Determination of correction factors to use for coating comparison**

To prepare coatings with commercial sorbents, particles of different size were immobilized because of limited commercial availability of 5  $\mu\text{m}$  particles in SPE cartridge format, while coating length and solid support core were kept constant at 15 mm and 1.55 mm, respectively for all lab-made coatings in this study. The coatings obtained from Supelco (both commercial and prototype) had different dimensions than lab-made coatings, so appropriate correction factors were needed to enable direct comparison of all coatings. Coating volume was estimated by simply treating all types of coatings as cylinders and assuming the entire volume of immobilized phase could act as sorbent. Based on SEM results, it was determined that a single layer of sorbent particles was immobilized using the described procedure for lab-made coatings for all particle sizes  $\geq 5 \mu\text{m}$ . Therefore, particle size was used as an approximation of coating thickness. However, particle size of 3  $\mu\text{m}$  resulted in multiple layer coverage with estimated coating thickness of 10  $\mu\text{m}$ , so this was used as coating thickness for this particular type of coating. In the next step, the volume of two cylinders was calculated: (i) the volume of fibre core cylinder only (radius = core diameter/2) and (ii) the volume of entire fibre (radius = fibre core diameter/2 + coating thickness). The volume of the coating is then determined by the subtraction of fibre core volume (i) from the total volume of entire fibre (ii). Full calculations for all types of coatings used in current study are shown in Supplementary Table 2. For sorbents where a range of particle sizes was given, the mean size was used as coating thickness for volume estimation. For example, for HR-P sorbent where size was reported as 50-100  $\mu\text{m}$ , the value of 75  $\mu\text{m}$  was used to estimate the coating volume. Clearly, the correction factors are only approximate because they assume (i) tight packing of spherical particles within the coating (ii) uniform size of all particles (iii) same extraction efficiency for sorbent and binder and (iv) do not take into account different surface areas and porosity of particles. Despite of this, the approximation is useful to give an estimate of how the performance of new coatings compares to existing coatings and to ensure coatings are not accidentally rejected simply based on different dimensions. Particle size information for Plexa, Plexa PCX and Focus sorbents from Varian and for Speed Advanta sorbent from Applied Separations could not be obtained as shown in Table 1 so no correction factor was applied to these coatings. This is in agreement with visual examination ( $< 50 \mu\text{m}$ ), so 40  $\mu\text{m}$  particle size appears to be a reasonable assumption for these coatings. No correction factor was applied for carbon tape coatings as the proportion of carbon was unknown. Therefore, the results for this coating are reported “as is”, whereas the results for all other coatings are reported with respect to performance of 40  $\mu\text{m}$  particle size which was arbitrarily selected as the reference point as shown in Supplementary Table 3.



**Supplementary Table 4. Determination of correction factors to use during coating comparison.**

|                             | Thickness<br>( $\mu\text{m}$ ) | Length<br>(cm) | Core<br>( $\mu\text{m}$ ) | Fibre<br>diameter<br>( $\mu\text{m}$ ) | Fibre<br>radius<br>( $\mu\text{m}$ ) | Core<br>radius<br>( $\mu\text{m}$ ) | Total<br>volume<br>( $\mu\text{m}^2\text{cm}$ ) | Core volume<br>( $\mu\text{m}^2\text{cm}$ ) | Coating<br>volume<br>( $\mu\text{m}^2\text{cm}$ ) | Correction<br>factor |
|-----------------------------|--------------------------------|----------------|---------------------------|----------------------------------------|--------------------------------------|-------------------------------------|-------------------------------------------------|---------------------------------------------|---------------------------------------------------|----------------------|
| lab-made                    | 213.5                          | 1.5            | 1550                      | 1977                                   | 988.5                                | 775                                 | 4.60E+07                                        | 2.83E+07                                    | 1.77E+07                                          | 0.17                 |
| lab-made                    | 85                             | 1.5            | 1550                      | 1720                                   | 860                                  | 775                                 | 3.49E+07                                        | 2.83E+07                                    | 6.55E+06                                          | 0.46                 |
| lab-made                    | 80                             | 1.5            | 1550                      | 1710                                   | 855                                  | 775                                 | 3.44E+07                                        | 2.83E+07                                    | 6.14E+06                                          | 0.49                 |
| lab-made                    | 51                             | 1.5            | 1550                      | 1652                                   | 826                                  | 775                                 | 3.22E+07                                        | 2.83E+07                                    | 3.85E+06                                          | 0.78                 |
| lab-made                    | 55                             | 1.5            | 1550                      | 1660                                   | 830                                  | 775                                 | 3.25E+07                                        | 2.83E+07                                    | 4.16E+06                                          | 0.72                 |
| lab-made                    | 75                             | 1.5            | 1550                      | 1700                                   | 850                                  | 775                                 | 3.40E+07                                        | 2.83E+07                                    | 5.74E+06                                          | 0.52                 |
| lab-made                    | 40                             | 1.5            | 1550                      | 1630                                   | 815                                  | 775                                 | 3.13E+07                                        | 2.83E+07                                    | 3.00E+06                                          | 1.00                 |
| lab-made                    | 45                             | 1.5            | 1550                      | 1640                                   | 820                                  | 775                                 | 3.17E+07                                        | 2.83E+07                                    | 3.38E+06                                          | 0.89                 |
| RPA 3 $\mu\text{m}$         | 10                             | 1.5            | 1550                      | 1570                                   | 785                                  | 775                                 | 2.90E+07                                        | 2.83E+07                                    | 7.35E+05                                          | 4.08                 |
| lab-made                    | 5                              | 1.5            | 1550                      | 1560                                   | 780                                  | 775                                 | 2.87E+07                                        | 2.83E+07                                    | 3.66E+05                                          | 8.18                 |
| lab-made                    | 33                             | 1.5            | 1550                      | 1616                                   | 808                                  | 775                                 | 3.08E+07                                        | 2.83E+07                                    | 2.46E+06                                          | 1.22                 |
| lab-made                    | 30                             | 1.5            | 1550                      | 1610                                   | 805                                  | 775                                 | 3.05E+07                                        | 2.83E+07                                    | 2.23E+06                                          | 1.34                 |
| lab-made                    | 50                             | 1.5            | 1550                      | 1650                                   | 825                                  | 775                                 | 3.21E+07                                        | 2.83E+07                                    | 3.77E+06                                          | 0.80                 |
| CW TPR                      | 50                             | 1.0            | 160                       | 260                                    | 130                                  | 80                                  | 5.31E+05                                        | 2.01E+05                                    | 3.30E+05                                          | 9.09                 |
| biocompatible<br>prototypes | 45                             | 1.5            | 200                       | 290                                    | 145                                  | 100                                 | 9.91E+05                                        | 4.71E+05                                    | 5.20E+05                                          | 5.77                 |
| PA                          | 85                             | 1.0            | 160                       | 330                                    | 165                                  | 80                                  | 8.55E+05                                        | 2.01E+05                                    | 6.54E+05                                          | 4.58                 |
| PDMS                        | 100                            | 1.0            | 160                       | 360                                    | 180                                  | 80                                  | 1.02E+06                                        | 2.01E+05                                    | 8.17E+05                                          | 3.67                 |
| PDMS DVB                    | 60                             | 1.0            | 160                       | 280                                    | 140                                  | 80                                  | 6.16E+05                                        | 2.01E+05                                    | 4.15E+05                                          | 7.23                 |

**Supplementary Table 5. Dependence of the extraction efficiency of Waters Oasis MAX, MCX, WAX and WCX coatings on sample pH.**

| pH     | Coating type | ADP  | AMP  | ATP  | Beta NAD | HBA  | Sucrose |
|--------|--------------|------|------|------|----------|------|---------|
| pH 3.0 | WAT MAX      | ND   | 0.01 | ND   | 0.13     | 23   | 0.54    |
|        | WAT MCX      | ND   | 0.04 | ND   | 0.38     | 32   | 0.55    |
|        | WAT WAX      | ND   | 0.01 | ND   | 0.15     | 24   | 0.48    |
|        | WAT WCX      | ND   | 0.01 | ND   | 0.15     | 30   | 0.53    |
| pH 5.0 | WAT MAX      | ND   | 0.19 | ND   | ND       | 39   | 0.22    |
|        | WAT MCX      | 0.03 | 0.16 | ND   | ND       | 35   | 0.30    |
|        | WAT WAX      | ND   | 0.19 | ND   | ND       | 48   | 0.28    |
|        | WAT WCX      | ND   | 0.15 | ND   | ND       | 49   | 0.29    |
| pH 7.4 | WAT MAX      | ND   | 0.15 | ND   | 1.1      | 27   | 0.31    |
|        | WAT MCX      | 0.05 | 0.12 | ND   | 0.72     | 29   | 0.26    |
|        | WAT WAX      | ND   | 0.21 | ND   | 0.86     | 39   | 0.29    |
|        | WAT WCX      | 0.02 | 0.13 | ND   | 0.64     | 33   | 0.32    |
| pH 9.5 | WAT MAX      | 0.05 | 0.32 | ND   | 8.7      | 2.2  | 0.78    |
|        | WAT MCX      | 0.09 | 0.27 | 0.05 | 2.8      | 2.5  | 0.41    |
|        | WAT WAX      | 0.17 | 0.74 | ND   | 7.5      | 0.78 | 0.91    |
|        | WAT WCX      | 0.31 | 0.62 | 0.15 | 5.8      | 1.4  | 0.87    |

**Supplementary Figure 1.** Dependence of the amount extracted of selected metabolites on extraction time using Supelco mixed-mode fibres (n=3 at each time point) after positive ESI pentafluorophenyl LC-MS analysis. The inset graph shows expanded region to facilitate the comparison of analytes with sub-ng amounts extracted. Polar metabolites (glutamic acid, histidine, lysine, choline, phenylalanine, tryptophan, nicotinamide) reached equilibrium within the shortest extraction time tested ( $\leq 5$  min). More hydrophobic metabolites (taurocholic acid, cholic acid, hydrocortisone and progesterone) required longer extraction times ( $\geq 1440$  min) to reach equilibrium. Table insert shows the results for ANOVA test indicating extraction time is not significant variable at 95% confidence for glutamic acid, histidine, lysine and nicotinamide when all time points are used. However, further examination of this data excluding the last time point (1440 min) indicates that equilibrium is in fact reached for choline, phenylalanine and tryptophan as well, because no statistically significant increases are observed as the extraction time is increased from 5-128 min. We attribute the discrepancy in P-values for the two ANOVA tests (including and excluding 1440 min extraction) to possible changes in the composition of plasma sample during 1440 min room temperature extraction due to degradation.

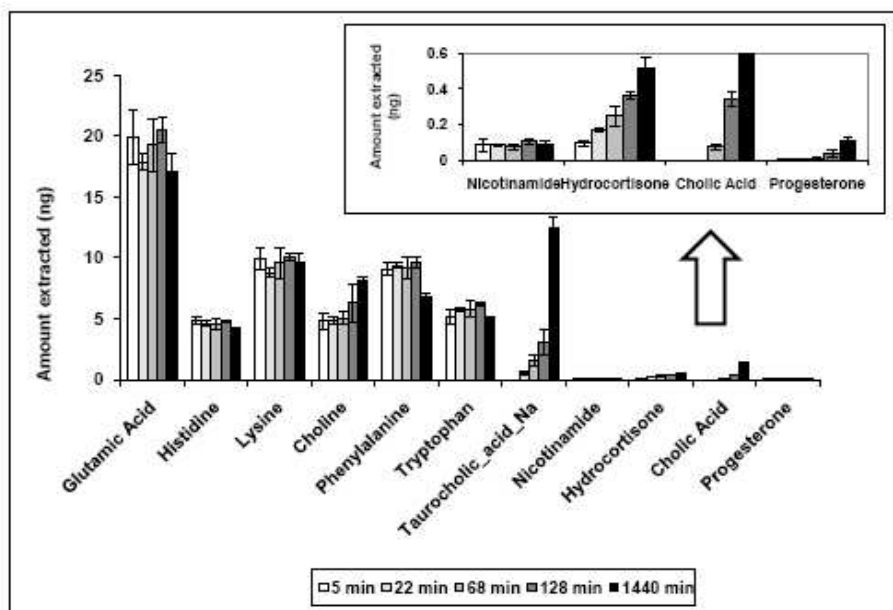

|               | All time points<br>P-value | 5-128 min timepoints<br>P-value | Conclusion                       |
|---------------|----------------------------|---------------------------------|----------------------------------|
| Glutamic acid | 0.13                       | 0.32                            | Equilibrium reached within 5 min |
| Histidine     | 0.07                       | 0.65                            | Equilibrium reached within 5 min |
| Lysine        | 0.36                       | 0.27                            | Equilibrium reached within 5 min |
| Choline       | 2.0E-03                    | 0.23                            | Equilibrium reached within 5 min |
| Phenylalanine | 4.9E-04                    | 0.63                            | Equilibrium reached within 5 min |

|                  |         |         |                                  |
|------------------|---------|---------|----------------------------------|
| Tryptophan       | 0.02    | 0.10    | Equilibrium reached within 5 min |
| Taurocholic acid | 1.6E-09 | 7.7E-04 | Equilibrium not reached          |
| Nicotinamide     | 0.38    | 0.28    | Equilibrium reached within 5 min |
| Hydrocortisone   | 8.5E-07 | 1.8E-05 | Equilibrium not reached          |
| Cholic acid      | 3.4E-08 | 1.1E-07 | Equilibrium not reached          |
| Progesterone     | 3.4E-08 | 0.03    | Equilibrium not reached          |

**Supplementary Figure 2.** Amount of carryover observed for a set of identified metabolites after extraction of a human plasma sample for 5, 22, 68, 128 and 1440 min. In all cases, desorption was performed using 300  $\mu$ L of acetonitrile/water (1/1, desorption solvent, 1 hr, 1000 rpm vortex agitation), and carryover was evaluated by performing a second desorption using a fresh portion of desorption solvent. Samples were analyzed using reverse-phase LC-MS method with a pentafluorophenyl column (a) in positive ESI mode and (b) in negative ESI mode. HBA stands for hydroxybutyric acid.

(a)

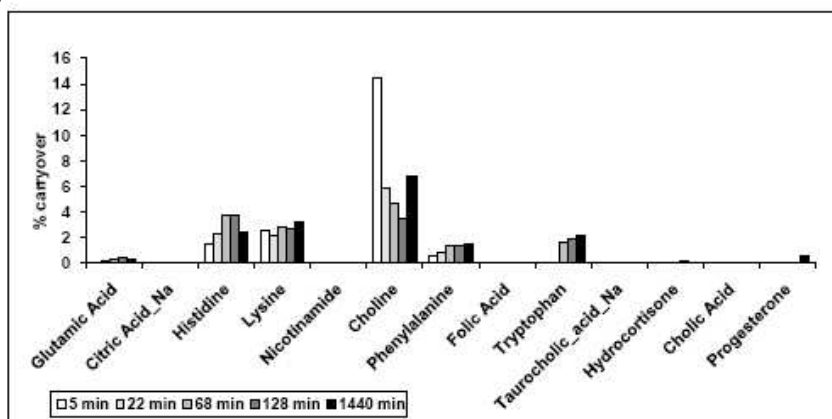

(b)

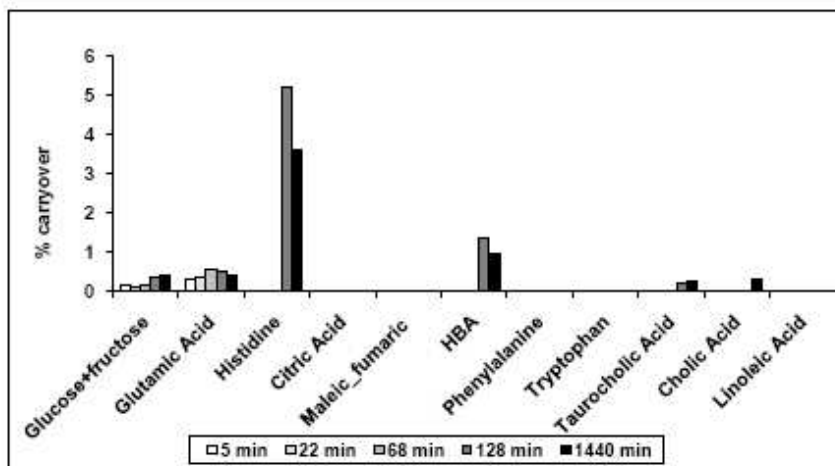

**Supplementary Figure 3.** Recommended SPME workflow for extraction of human plasma for metabolite profiling studies using mixed-mode (C18+ benzenesulfonic acid) coating.

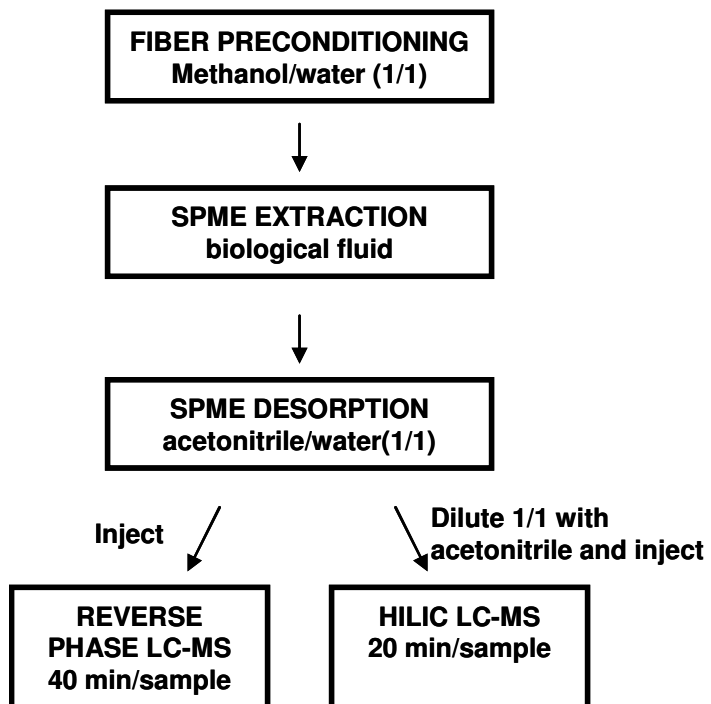

**Supplementary Figure 4.** Absolute matrix effects for identified metabolites in human plasma using SPME as sample preparation method and (a) a positive ESI LC-MS method with pentafluorophenyl column and (b) a negative ESI LC-MS method with pentafluorophenyl column (c) a positive ESI HILIC LC-MS method and (d) a negative ESI HILIC LC-MS method.

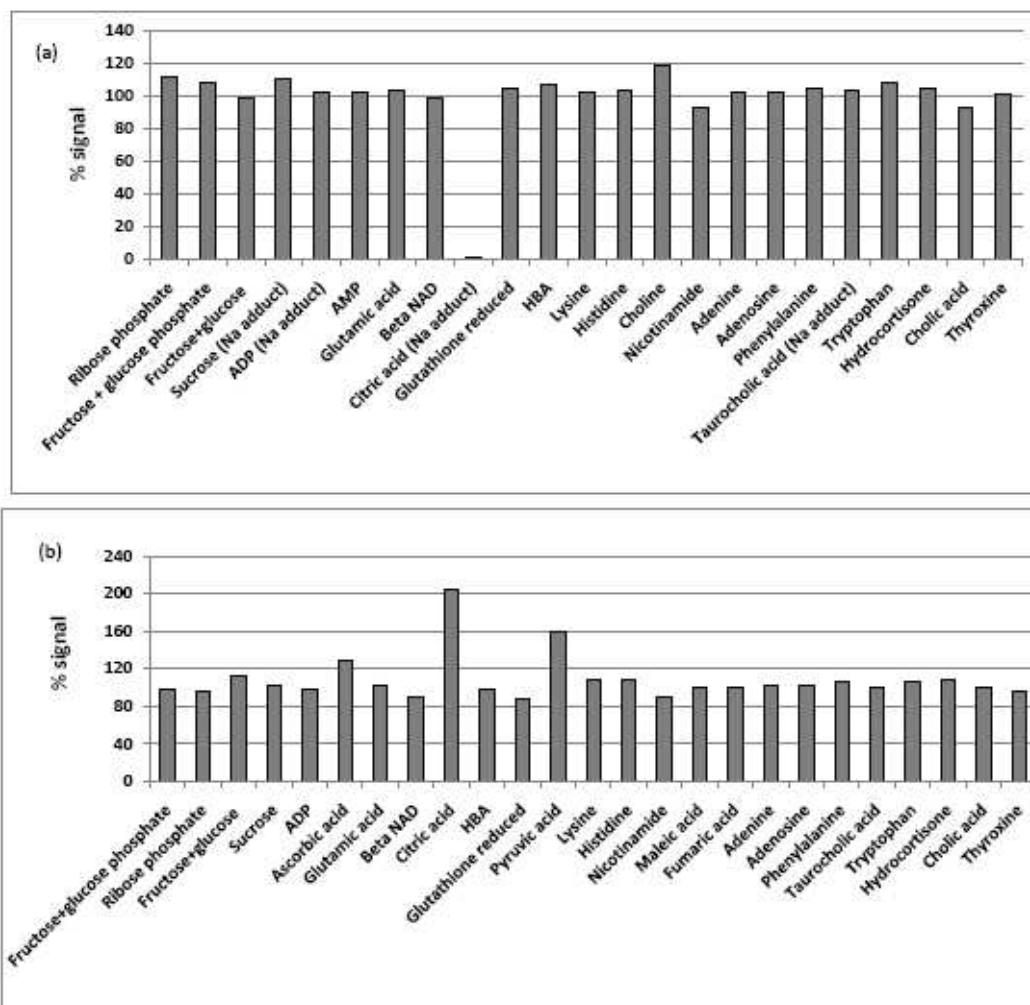

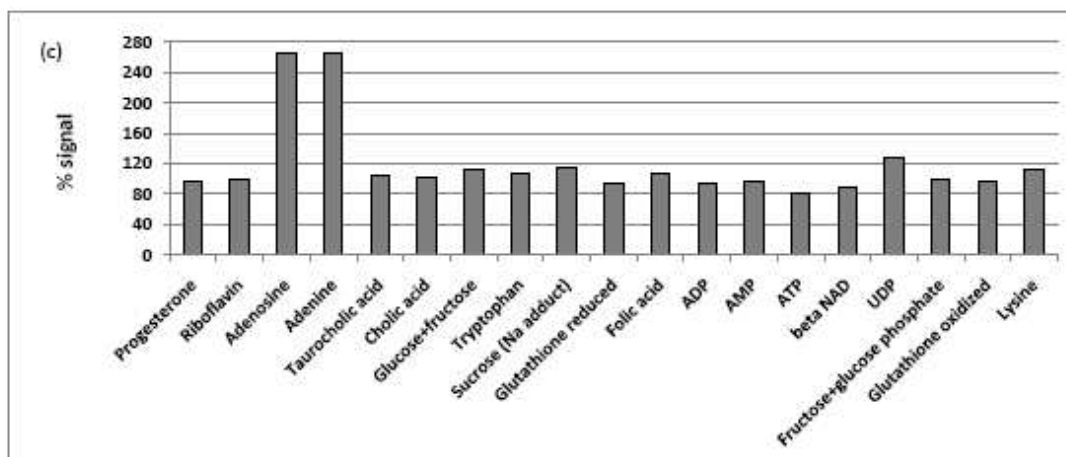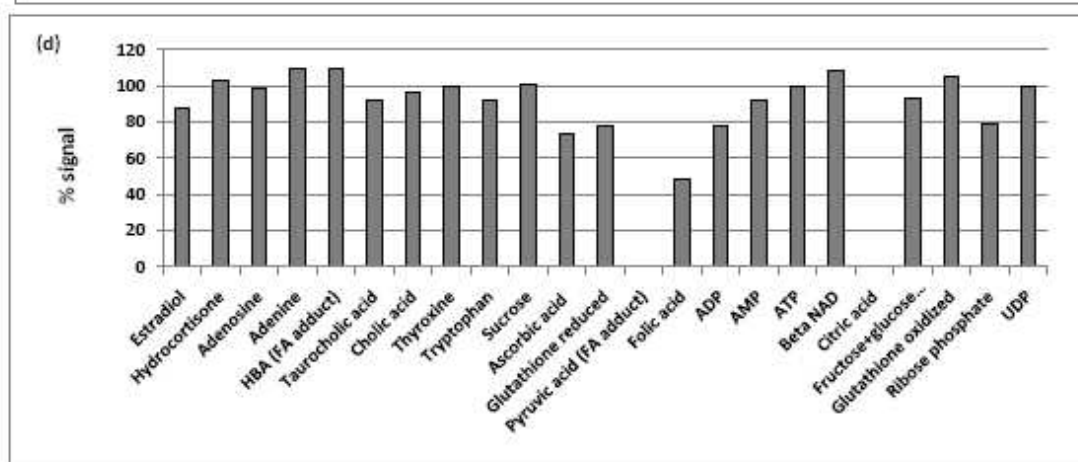



**Supplementary Figure 5.** Comparison of metabolite coverage in human plasma in the format of ion map and obtained using (a) PP (b) PM and (c) UF using negative ESI LC-MS method with a pentafluorophenyl column.

(a)

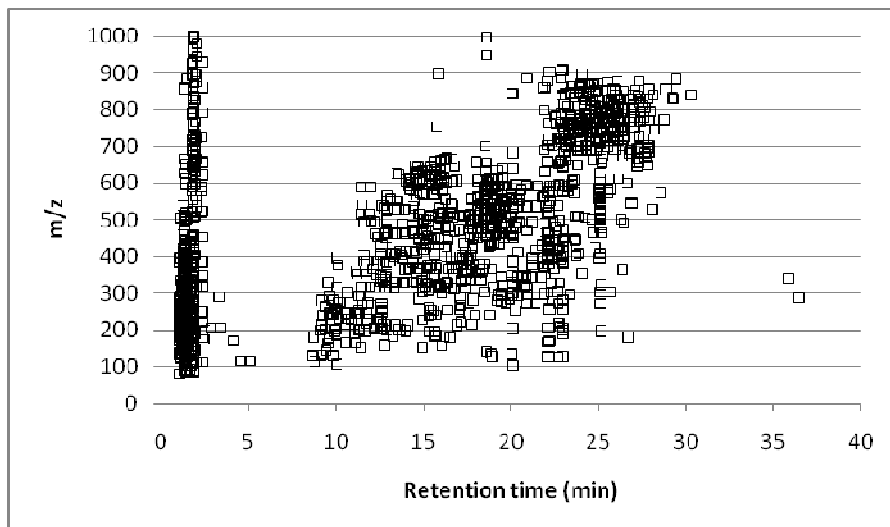

(b)

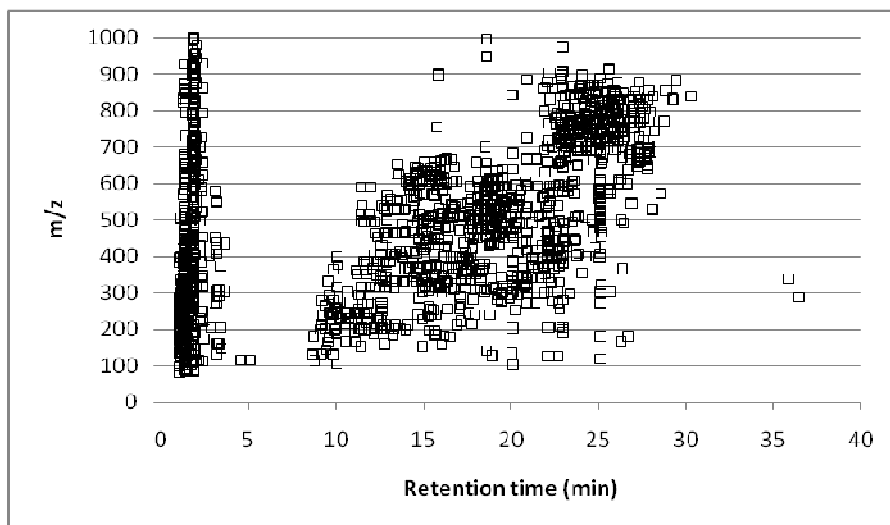

(c)

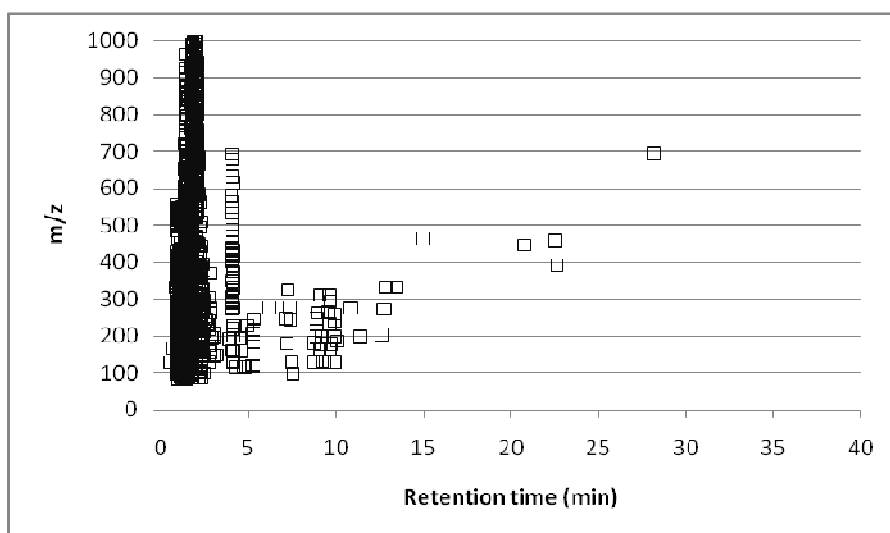

Supplement: Supplementary file 1 [file 4349017]
